# Supplementary material
Source: Research Square preprint supplement (doi:10.21203/rs.3.rs-9643923/v1)

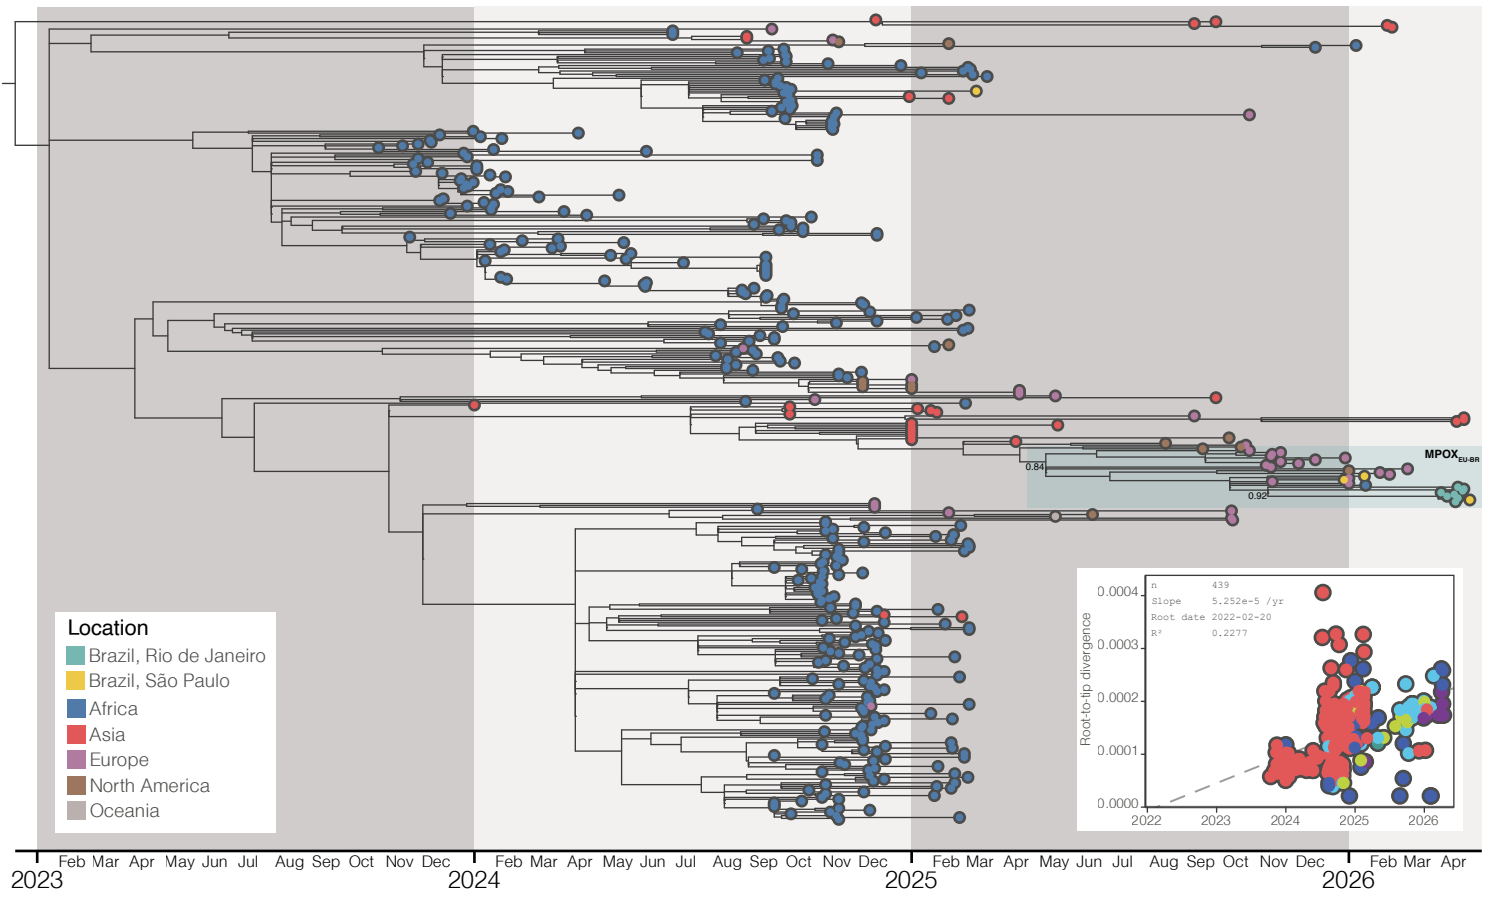

Supplement: Supplementary file 2 [file fd2a47310f3d8e22f1ec784c.pdf]
